# Supplementary material
Source: PubMed Central journal article supplement (PMC9106903)
Supplement: NIHMS1788773-supplement-1.pdf [file NIHMS1788773-supplement-1.pdf]

## Supplementary Material: White Matter Tract Integrity (WMTI) Method

The theory underlying the White Matter Tract Integrity (WMTI) method is described in detail by Fieremans et al.<sup>13</sup> Here we give a brief synopsis of its main assumptions and equations.

A primary assumption underlying WMTI is that the axons are mostly oriented in similar directions. This is usually reasonably well satisfied in brain regions with a high fractional anisotropy (FA), and the accuracy of WMTI improves with increasing FA, as suggested by a comparison with a more comprehensive model for white matter microstructure.<sup>77</sup> A second assumption is that molecular exchange between the intra-axonal and extra-axonal water pools is slow in comparison to the diffusion time for the pulse sequence used to acquire the diffusion data. Inter-compartmental exchange times for white matter have been measured to be around 1 second<sup>78</sup>, which is indeed long in comparison to typical diffusion times of about 30-40 ms for clinical MRI systems.

Of the several parameters that can be estimated with WMTI, two of the most important are the axonal water fraction (AWF) and the extra-axonal radial diffusivity ( $D_{e,\perp}$ ). The AWF for any given voxel is estimated by the formula

$$f = \frac{K_{max}}{K_{max} + 3}, \quad (1)$$

where  $f$  is the AWF and  $K_{max}$  is the maximum of the diffusional kurtosis for that voxel over all possible diffusion directions<sup>13</sup>. The diffusional kurtosis is a standard diffusion parameter that is provided by diffusional kurtosis imaging<sup>12</sup> (DKI). The WMTI estimate for the extra-axonal radial diffusivity is then given by

$$D_{e,\perp} = D_{\perp} \left[ 1 + \sqrt{\frac{K_{\perp} f}{3(1-f)}} \right], \quad (2)$$

where  $D_{\perp}$  is the radial diffusivity and  $K_{\perp}$  is the radial kurtosis, both of which can also be obtained with DKI.
